# Supplementary material for: A phenylbenzoxazole–amide–azacrown linkage as a selective fluorescent receptor for ratiometric sensing of Pb(ii) in aqueous media
Source: Royal Society of Chemistry journal article supplement (doi:10.1039/c3cc41151f), 2013-01-01
Supplement: c3cc41151f.pdf [file c3cc41151f.pdf]

# A phenylbenzoxazole-amide-azacrown linkage as a selective fluorescent receptor for ratiometric sensing of Pb(II) in aqueous media

Yasuhiro Shiraishi,\* Yoshinao Matsunaga, Prannicha Hongpitakpong and Takayuki Hirai

*Research Center for Solar Energy Chemistry, and Division of Chemical Engineering, Graduate School of Engineering Science, Osaka University, Toyonaka 560-8531, Japan.*

E-mail: shiraish@cheng.es.osaka-u.ac.jp

## Electronic Supplementary Information (ESI†)

### CONTENTS

|                                                                                                      | Page |
|------------------------------------------------------------------------------------------------------|------|
| <b>Experimental</b> .....                                                                            | 2    |
| <b>References</b> .....                                                                              | 3    |
| <b>Table S1</b> Electronic transition properties.....                                                | 4    |
| <b>Table S2</b> Protonation/stability constants of <b>L</b> .....                                    | 4    |
| <b>Fig. S1</b> <sup>1</sup> H NMR chart of <b>L</b> .....                                            | 5    |
| <b>Fig. S2</b> <sup>13</sup> C NMR chart of <b>L</b> .....                                           | 6    |
| <b>Fig. S3</b> FAB–MS chart of <b>L</b> .....                                                        | 7    |
| <b>Fig. S4</b> Absorption spectra of <b>L</b> measured with respective metal cations .....           | 8    |
| <b>Fig. S5</b> Time-dependent change in fluorescence spectra of <b>L</b> with Pb <sup>2+</sup> ..... | 8    |
| <b>Fig. S6</b> Effect of other metal cations on the Pb <sup>2+</sup> -induced fluorescence.....      | 9    |
| <b>Fig. S7</b> Job's plot of <b>L</b> with Pb <sup>2+</sup> .....                                    | 9    |
| <b>Fig. S8</b> ESI–MS chart of <b>L</b> with Pb <sup>2+</sup> .....                                  | 10   |
| <b>Fig. S9</b> Absorption and fluorescence spectra of <b>L</b> measured with Pb <sup>2+</sup> .....  | 10   |
| <b>Fig. S10</b> Effect of pH on fluorescence spectra.....                                            | 11   |
| <b>Fig. S11</b> IR spectra of <b>L</b> .....                                                         | 12   |
| <b>Fig. S12</b> Effect of water amount on fluorescence spectra.....                                  | 12   |
| Cartesian coordinates for <b>L</b> and <b>L</b> – Pb <sup>2+</sup> .....                             | 13   |

## Experimental

### Materials.

All reagents were supplied from Wako, Sigma-Aldrich, and Tokyo Kasei and used without further purification. Perchlorate ( $\text{Cu}^{2+}$ ,  $\text{Na}^+$ ,  $\text{Hg}^{2+}$ ,  $\text{Fe}^{2+}$ ,  $\text{Mn}^{2+}$ ,  $\text{Cr}^{3+}$ ,  $\text{Fe}^{3+}$ ,  $\text{Co}^{2+}$ ,  $\text{Zn}^{2+}$ ,  $\text{Mg}^{2+}$ ,  $\text{Li}^+$ ,  $\text{Ni}^{2+}$ ,  $\text{Cd}^{2+}$ ,  $\text{K}^+$ ,  $\text{Ca}^{2+}$ ,  $\text{Pb}^{2+}$ ) and tetrafluoroborate ( $\text{Ag}^+$ ) salts were used as the metal cation source. Water was purified by the Milli-Q system. **1** was synthesized according to literature procedure.<sup>[1]</sup>

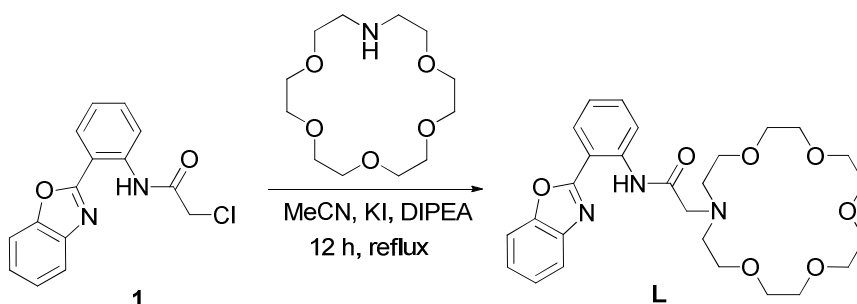

### Synthesis of L.

**1** (86.0 mg, 0.30 mmol), 1-aza-18-crown-6-ether (92.2 mg, 0.35 mmol), KI (30 mg), and DIPEA (500  $\mu\text{L}$ ) were added to MeCN (40 mL), and the solution was refluxed for 12 h under  $\text{N}_2$ . The resultant was concentrated by evaporation and purified by silica gel column chromatography ( $\text{CH}_2\text{Cl}_2/\text{MeOH}$ , 11/1 v/v), affording **L** as a yellow solid (80.0 mg, 52%).  $^1\text{H}$  NMR (400 MHz,  $\text{CD}_3\text{OD}$ , TMS):  $\delta$  = 2.88–2.91 (m, 4H), 3.54–3.71 (m, 22H), 7.31 (t,  $J$  = 7.10 Hz, 1H), 7.44–7.47 (m, 2H), 7.56–7.60 (m, 1H), 7.69–7.71 (m, 1H), 7.83–7.85 (m, 1H), 8.25 (dd,  $J$  = 1.37, 7.79 Hz, 1H), 8.70 (d,  $J$  = 8.24 Hz, 1H).  $^{13}\text{C}$  NMR (100 MHz,  $\text{CD}_3\text{OD}$ , TMS):  $\delta$  = 173.13, 163.15, 150.82, 142.14, 139.45, 133.75, 129.80, 127.30, 126.37, 125.08, 122.21, 120.88, 115.29, 111.85, 71.19, 71.08, 71.04, 71.02, 69.38, 59.74, 57.83. FAB–MS:  $m/z$  calcd for  $\text{C}_{27}\text{H}_{35}\text{N}_3\text{O}_7$ : 513.25; found: 536.4 [ $\text{M} + \text{Na}^+$ ]. HR–MS (FAB):  $m/z$  calcd for [ $\text{M} + \text{Na}^+$ ], 536.2373; Found, 536.2377.

### Measurements.

UV–vis absorption spectra were measured at 298 K on an UV–visible photodiode–array spectrophotometer (Shimadzu; Multispec–1500) equipped with a temperature controller.<sup>[2]</sup> Fluorescence spectra were measured at 298 K on a JASCO FP–6500 fluorescence spectrophotometer equipped with a temperature controller. FT-IR spectra were recorded at room temperature using a JASCO FTIR–610 spectrometer with a liquid sample cell with a  $\text{CaF}_2$  window.<sup>[3]</sup>  $^1\text{H}$  and  $^{13}\text{C}$  NMR spectra were obtained by a JEOL JNM–AL400 spectrometer using TMS as standard. FAB and ESI–MS analysis was performed by a JEOL–JMS 700 Mass Spectrometer.

### Potentiometric titration.

The titrations were performed on a COMTITE–550 potentiometric automatic titrator (Hiranuma Co., Ltd.) with a glass electrode GE–101.<sup>[4,5]</sup> Aqueous solution (water/MeCN, 1/1 v/v) containing

L in the absence or presence of  $\text{Pb}(\text{ClO}_4)_2$  (1 equiv) was kept under dry  $\text{N}_2$  at 298 K. The titration was done at  $298 \pm 1$  K in the presence of 0.15 M NaCl. The program HYPERQUAD was used for determination of protonation and stability constants.<sup>[6]</sup>  $K_w$  ( $= [\text{H}^+][\text{OH}^-]$ ) value used was  $10^{-14.00}$  (298 K). The stability constants used for  $\text{Pb}^{2+}$  hydrolysis (298 K) were  $\log K$  ( $\text{Pb}(\text{OH})/\text{Pb}\cdot\text{OH}$ ) = -8.00, ( $\text{Pb}(\text{OH})_2/\text{Pb}\cdot 2\text{OH}$ ) = -17.41, ( $\text{Pb}(\text{OH})_3/\text{Pb}\cdot 3\text{OH}$ ) = -28.06, ( $\text{Pb}_2(\text{OH})/2\text{Pb}\cdot\text{OH}$ ) = -6.07, ( $\text{Pb}_3(\text{OH})_4/3\text{Pb}\cdot 4\text{OH}$ ) = -24.45, ( $\text{Pb}_4(\text{OH})_4/4\text{Pb}\cdot 4\text{OH}$ ) = -20.31, and ( $\text{Pb}_6(\text{OH})_8/6\text{Pb}\cdot 8\text{OH}$ ) = -43.61, respectively.<sup>[7]</sup>

### Computational details.

Ab initio calculations were carried out with the Gaussian 03 program.<sup>[8]</sup> Geometry optimization was performed with the density functional theory (DFT) using the B3LYP function within the Gaussian 03 program. Calculations were carried out using the 6-31G\* basis set for all atoms except for  $\text{Pb}^{2+}$ , for which Stuttgart/Dresden (SDD)<sup>[9]</sup> basis set with effective core potential was used. Electronic excitation energies and oscillator strengths were calculated with the time-dependent density functional theory (TDDFT) at the same level of optimization using the polarizable continuum model (PCM)<sup>[10]</sup> with water as a solvent. Cartesian coordinates for respective compounds are summarized in the end of this ESI.

### References

- [1] M. Chen, X. Lv, Y. Liu, Y. Zhao, J. Liu, P. Wang and W. Guo, *Org. Biomol. Chem.*, 2011, **9**, 2345–2349.
- [2] D. Wang, R. Miyamoto, Y. Shiraishi and T. Hirai, *Langmuir*, 2009, **25**, 13176–13182.
- [3] Y. Shiraishi, Y. Matsunaga and T. Hirai, *Chem. Commun.*, 2012, **48**, 5485–5487.
- [4] Y. Shiraishi, Y. Tokitoh, G. Nishimura and T. Hirai, *Org. Lett.*, 2005, **7**, 2611–2614.
- [5] Y. Shiraishi, Y. Tokitoh and T. Hirai, *Chem. Commun.*, 2005, 5316–5318.
- [6] A. Sabatini, A. Vacca and P. Gans, *Coord. Chem. Rev.*, 1992, **120**, 389–405.
- [7] C. F. Baes and R. E. Mesmer, *The Hydrolysis of Cations*, John Wiley, New York, 1976.
- [8] Gaussian 03, Revision B.05, M. J. Frisch, G. W. Trucks, H. B. Schlegel, G. E. Scuseria, M. A. Robb, J. R. Cheeseman, Jr., J. A. Montgomery, T. Vreven, K. N. Kudin, J. C. Burant, J. M. Millam, S. S. Iyengar, J. Tomasi, V. Barone, B. Mennucci, M. Cossi, G. Scalmani, N. Rega, G. A. Petersson, H. Nakatsuji, M. Hada, M. Ehara, K. Toyota, R. Fukuda, J. Hasegawa, M. Ishida, T. Nakajima, Y. Honda, O. Kitao, H. Nakai, M. Klene, X. Li, J. E. Knox, H. P. Hratchian, J. B. Cross, V. Bakken, C. Adamo, J. Jaramillo, R. Gomperts, R. E. Stratmann, O. Yazyev, A. J. Austin, R. Cammi, C. Pomelli, J. W. Ochterski, P. Y. Ayala, K. Morokuma, G. A. Voth, P. Salvador, J. J. Dannenberg, V. G. Zakrzewski, S. Dapprich, A. D. Daniels, M. C. Strain, O. Farkas, D. K. Malick, A. D. Rabuck, K. Raghavachari, J. B. Foresman, J. V. Ortiz, Q. Cui, A. G. Baboul, S. Clifford, J. Cioslowski, B. B. Stefanov, G. Liu, A. Liashenko, P. Piskorz, I. Komaromi, R. L. Martin, D. J. Fox, T. Keith, M. A. Al-Laham, C. Y. Peng, A.

Nanayakkara, M. Challacombe, P. M. W. Gill, B. Johnson, W. Chen, M. W. Wong, C. Gonzalez, J. A. Pople, Gaussian, Inc., Wallingford CT, 2004.

[9] D. Andrae, U. Häußermann, M. Dolg, H. Stoll and H. Preuß, *Theor. Chim. Acta*, 1990, **77**, 123–141.

[10] M. Cossi, V. Barone, R. Cammi and J. Tomasi, *Chem. Phys. Lett.*, 1996, **255**, 327–335.

**Table S1.** Calculated excitation energy ( $E$ ), wavelength ( $\lambda$ ), and oscillator strength ( $f$ ) for low-lying singlet state ( $S_n$ ) of **L** and **L–Pb<sup>2+</sup>**.

| Species                  |                       | Main orbital transition (CIC <sup>a</sup> ) | $E$ / eV | $\lambda$ / nm | $f$    |
|--------------------------|-----------------------|---------------------------------------------|----------|----------------|--------|
| <b>L</b>                 | $S_0 \rightarrow S_1$ | HOMO→LUMO (0.70109)                         | 3.1850   | 389.28         | 0.0007 |
|                          | $S_0 \rightarrow S_2$ | HOMO–1→LUMO (0.64740)                       | 3.8267   | 323.99         | 0.4833 |
| <b>L–Pb<sup>2+</sup></b> | $S_0 \rightarrow S_1$ | HOMO→LUMO (0.66580)                         | 3.8539   | 321.71         | 0.6499 |
|                          | $S_0 \rightarrow S_2$ | HOMO–1→LUMO (0.42379)                       | 4.2011   | 295.13         | 0.0732 |

<sup>a</sup> CI expansion coefficients for the main orbital transitions.

**Table S2.** Protonation/stability constants of **L**.<sup>a</sup>

| Reaction                                               | log K       |
|--------------------------------------------------------|-------------|
| <b>L</b> + H <sup>+</sup> = <b>LH</b>                  | 6.04 ± 0.19 |
| <b>L</b> + Pb <sup>2+</sup> = <b>L–Pb<sup>2+</sup></b> | 6.20 ± 0.25 |

<sup>a</sup> Measurements were carried out in an aqueous solution (water/MeCN; 1/1 v/v) at 298 K in the presence of 0.15 M NaCl.

2\_Proton-1-1.jdf  
COMNT single\_pulse  
DATIM 2012-07-28 00:40:05  
OBNUC 1H  
EXMOD proton.jxp  
OBFRQ 399.78 MHz  
OBSET 4.19 KHz  
OBFIN 7.29 Hz  
POINT 16384  
FREQU 7503.00 Hz  
SCANS 8  
ACQTM 2.1837 sec  
PD 10.0000 sec  
PW1 5.00 usec  
IRNUC 1H  
CTEMP 30.0 C  
SOLVT CD3OD  
EXREF 0.00 ppm  
BF 0.12 Hz  
RGAIN 30

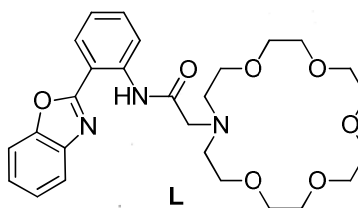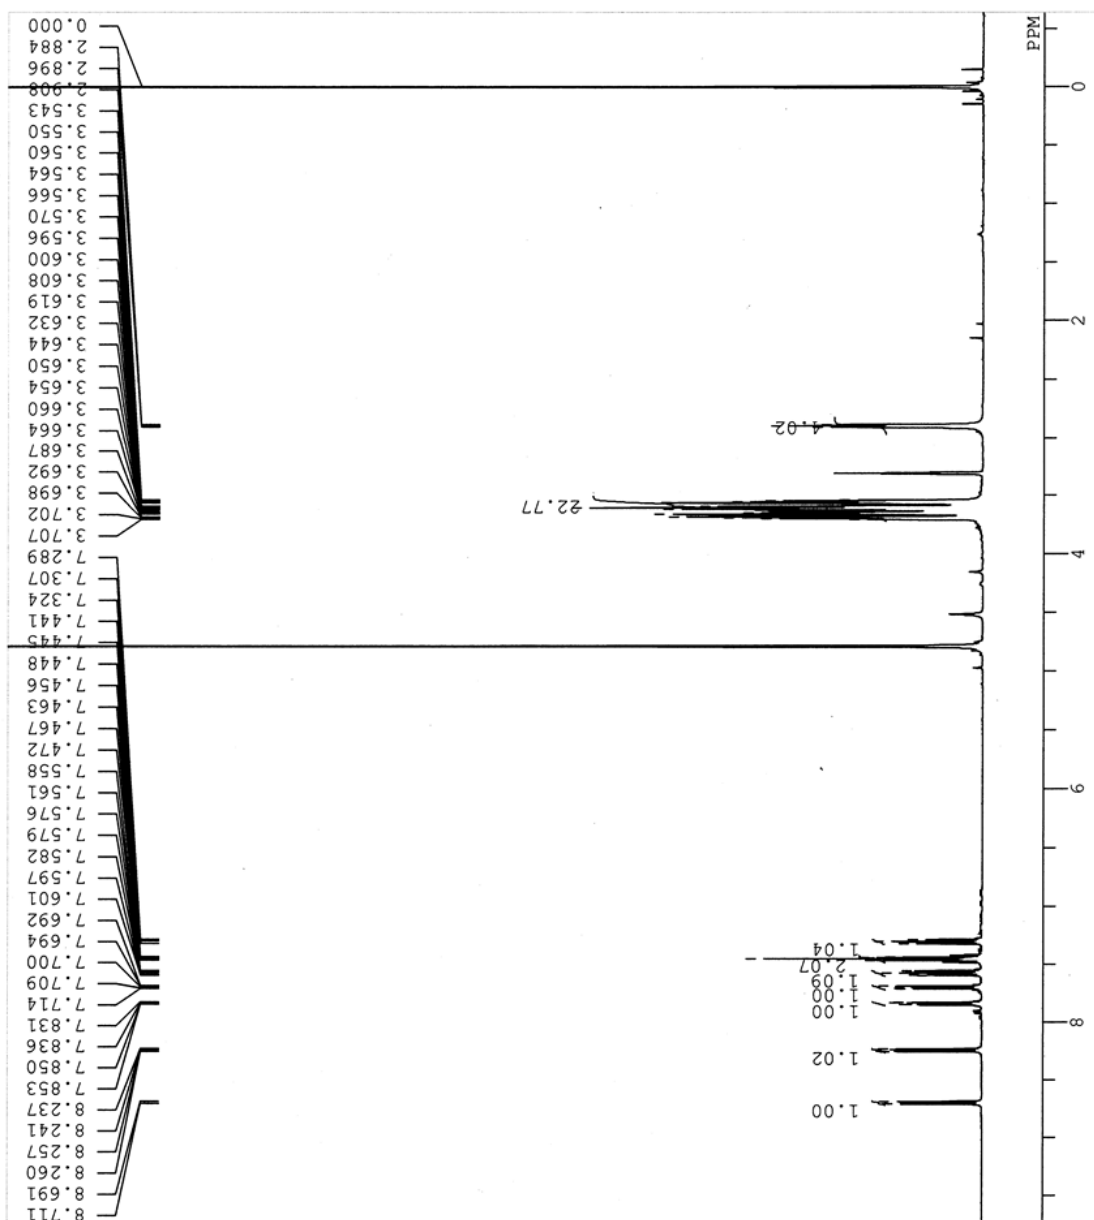

Fig. S1 <sup>1</sup>H NMR chart of L in CD<sub>3</sub>OD (400 MHz).

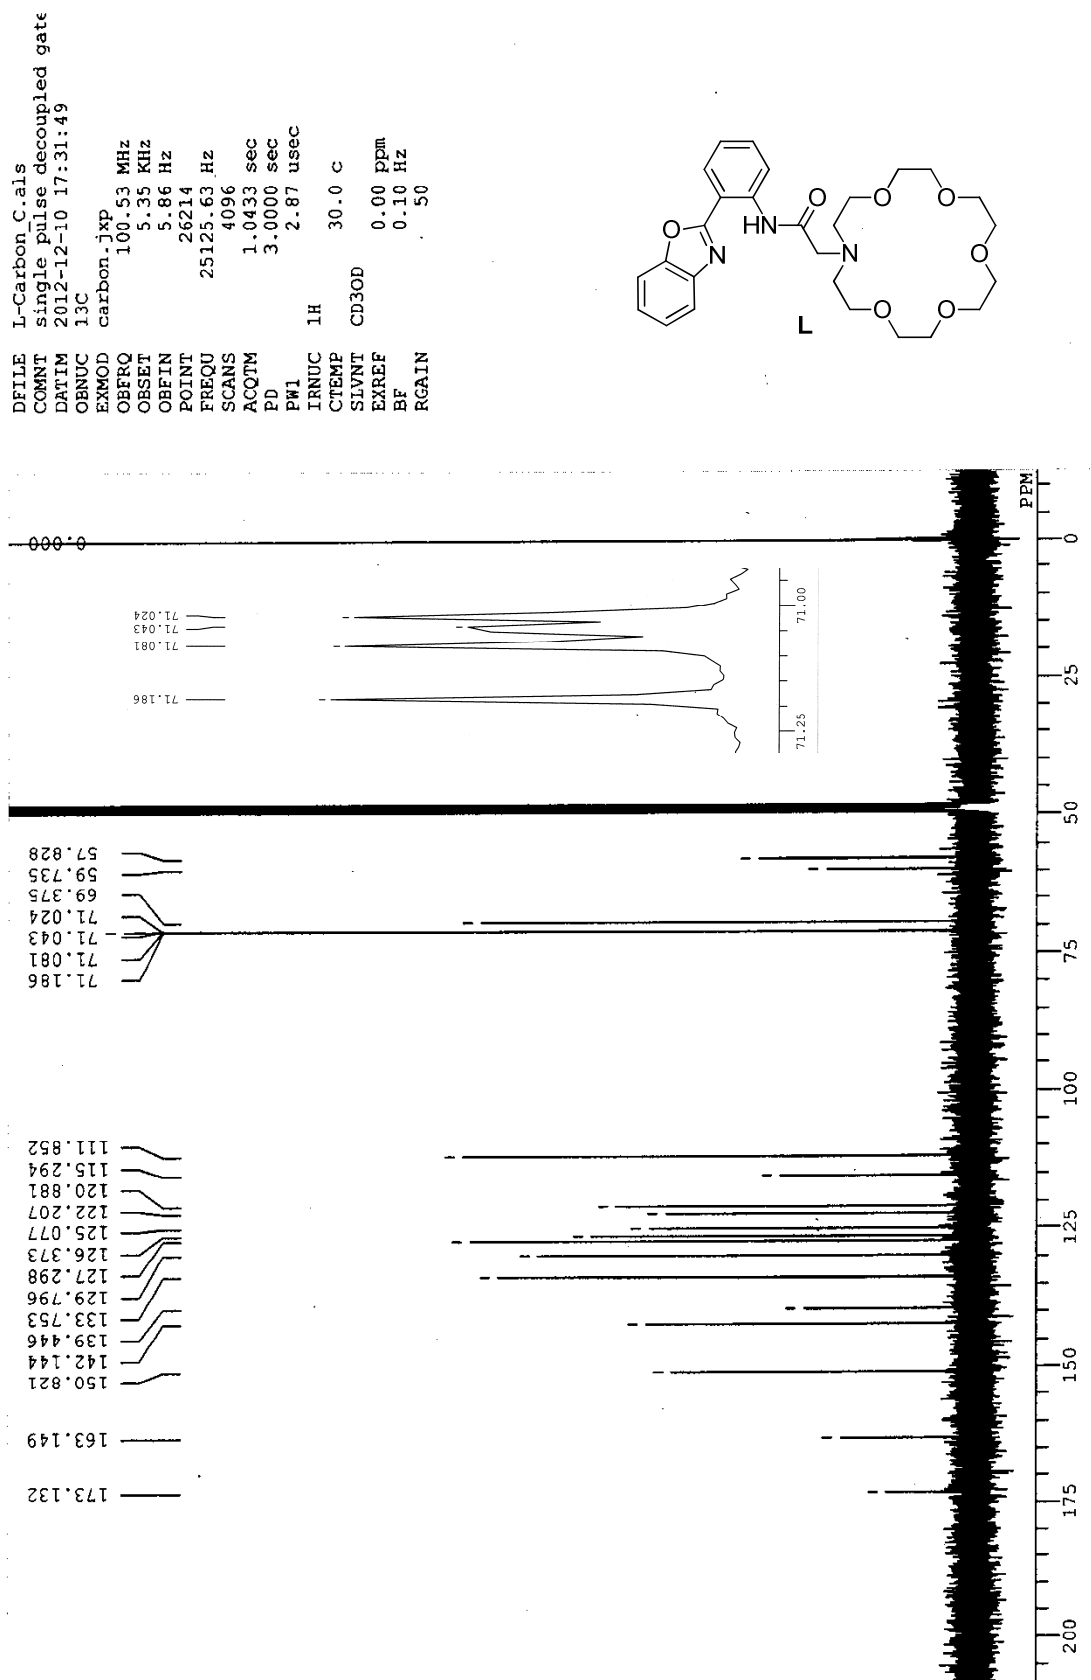

Fig. S2 <sup>13</sup>C NMR chart of **L** in CD<sub>3</sub>OD (100 MHz).

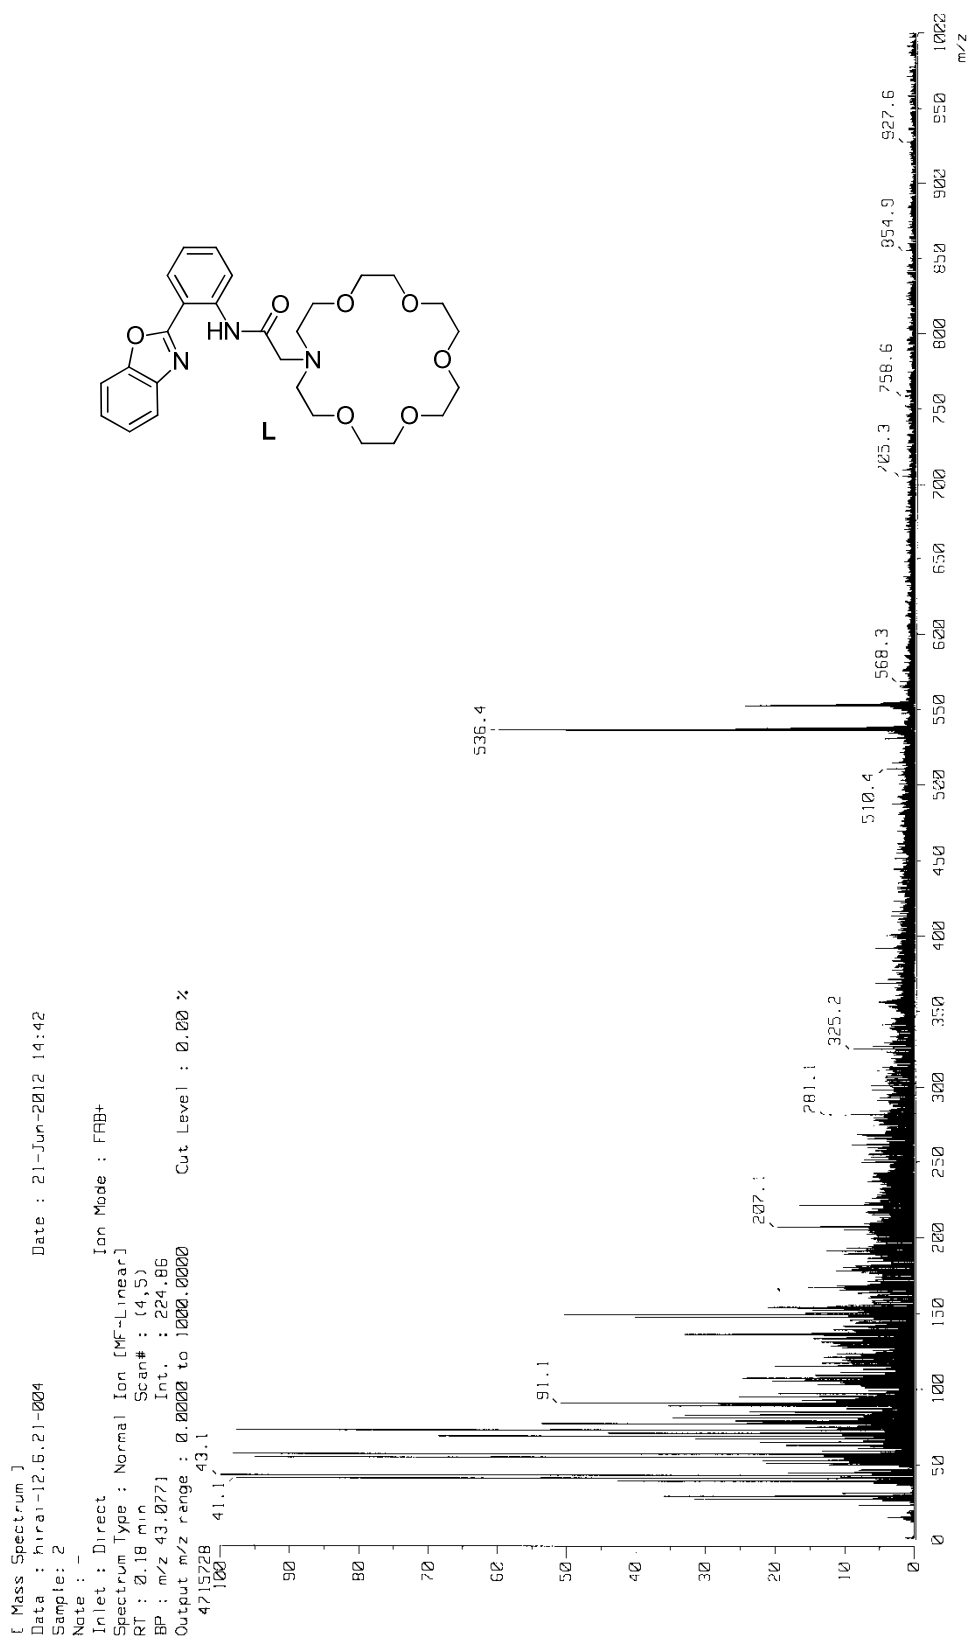

Fig. S3 FAB-MS chart of L.

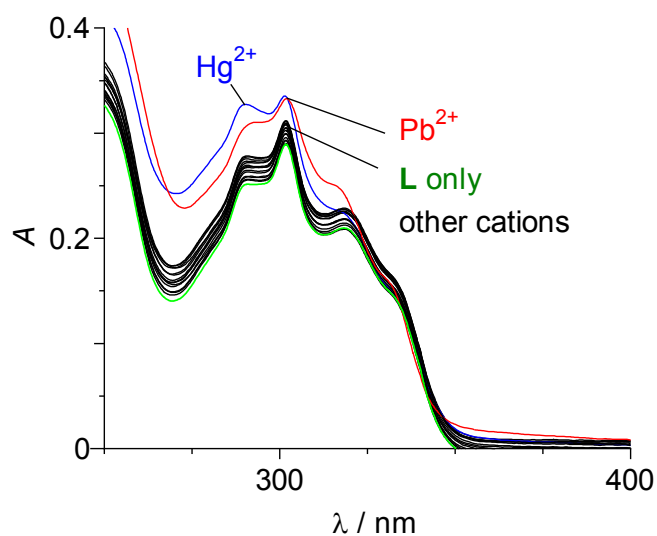

**Fig. S4** Absorption spectra of **L** (20  $\mu\text{M}$ ) measured in a buffered water/MeCN mixture (1/1 v/v; HEPES 100 mM; pH 7.0) with each respective metal cation (1 equiv).

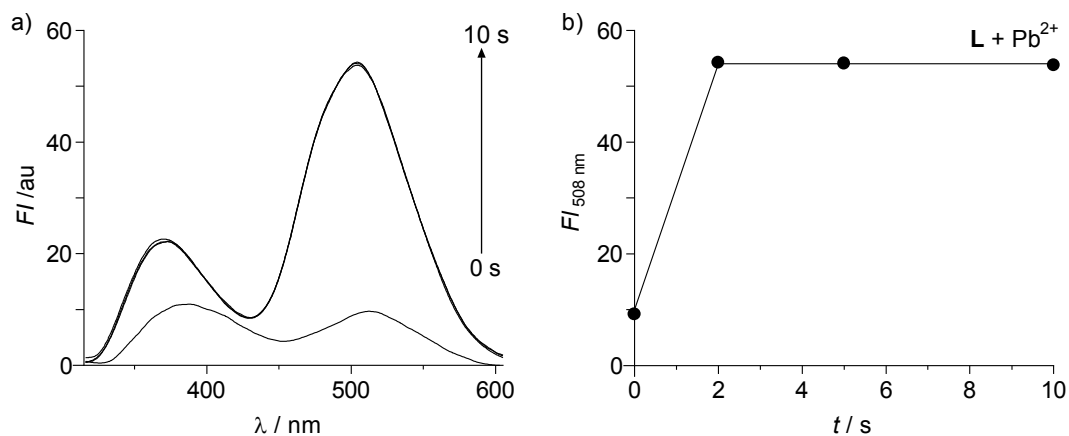

**Fig. S5** (a) Time-dependent change in fluorescence spectra ( $\lambda_{\text{ex}} = 311 \text{ nm}$ ) of **L** (20  $\mu\text{M}$ ) measured in a buffered water/MeCN mixture (1/1 v/v; HEPES 100 mM; pH 7.0), after addition of 1 equiv of  $\text{Pb}^{2+}$ . (b) Change in fluorescence intensity at 508 nm.



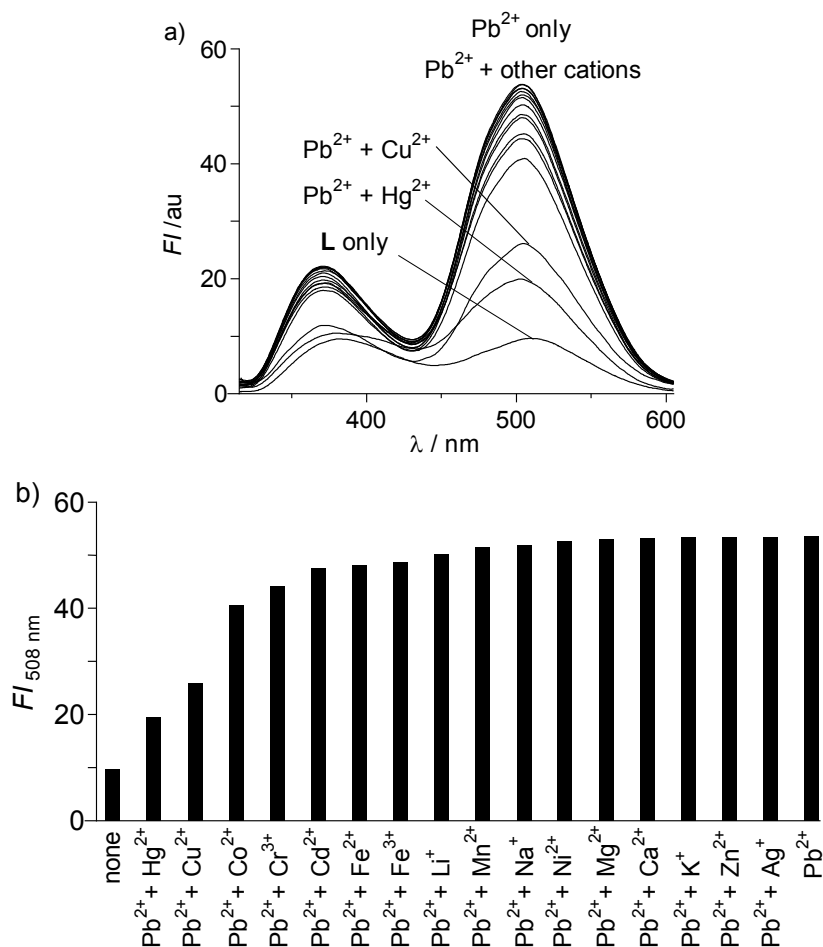

**Fig. S6** (a) Fluorescence spectra ( $\lambda_{\text{ex}} = 311$  nm) of **L** (20  $\mu\text{M}$ ) measured in a buffered water/MeCN mixture (1/1 v/v; HEPES 100 mM; pH 7.0) with 1 equiv of  $\text{Pb}^{2+}$  together with 1 equiv of other respective metal cation. (b) Fluorescence intensity at 508 nm.

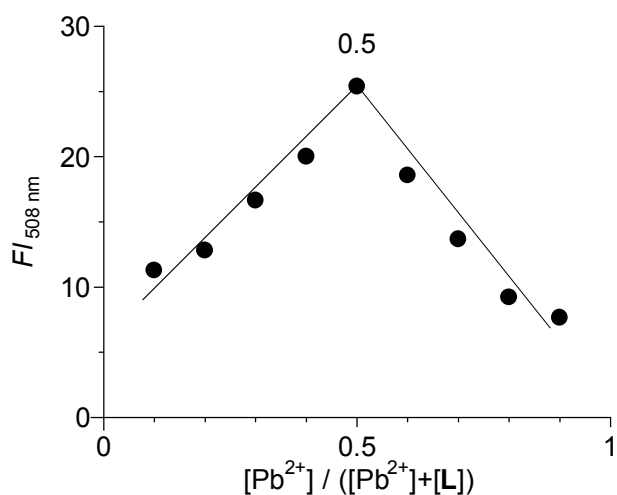

**Fig. S7** Job's plot of **L** with  $\text{Pb}^{2+}$  obtained by fluorescence measurements ( $\lambda_{\text{ex}} = 311$  nm). Total concentration of **L** and  $\text{Pb}^{2+}$  is 20  $\mu\text{M}$ .

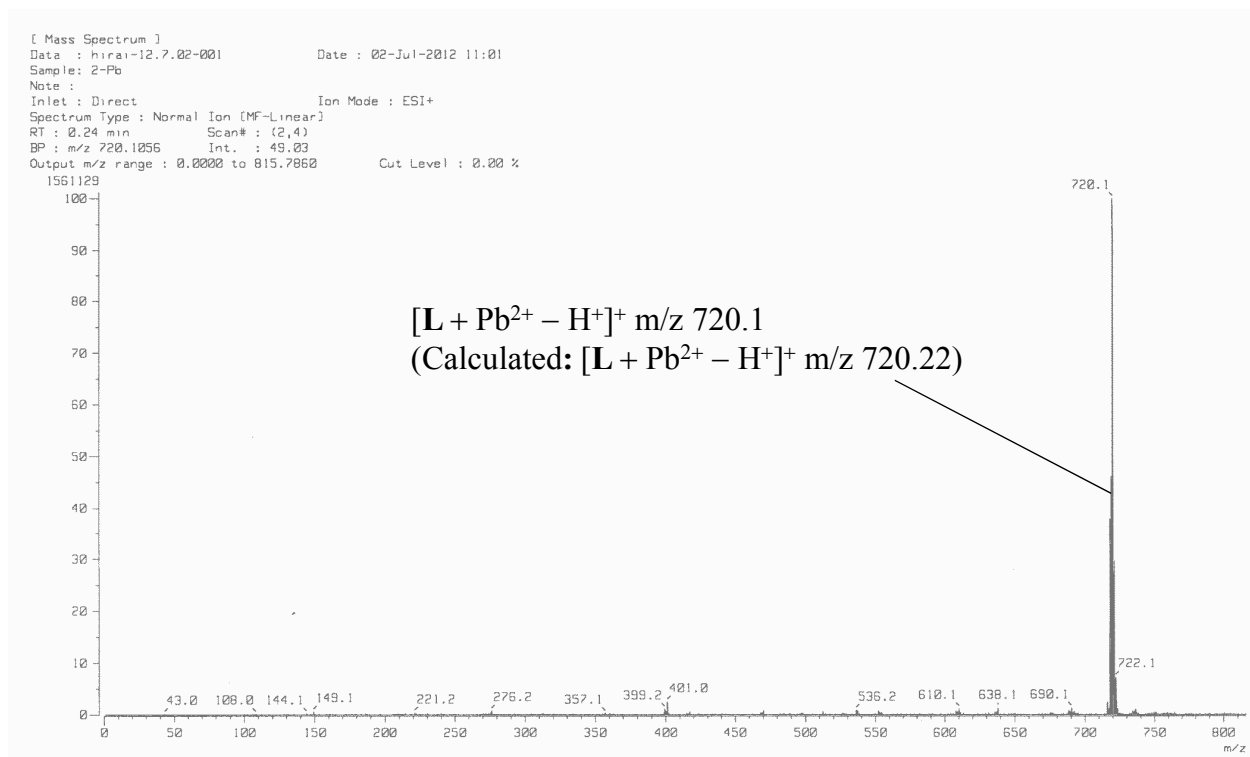

**Fig. S8** ESI-MS chart of a water/MeCN (1/1 v/v) mixture containing of **L** and 1 equiv of Pb(ClO<sub>4</sub>)<sub>2</sub>.

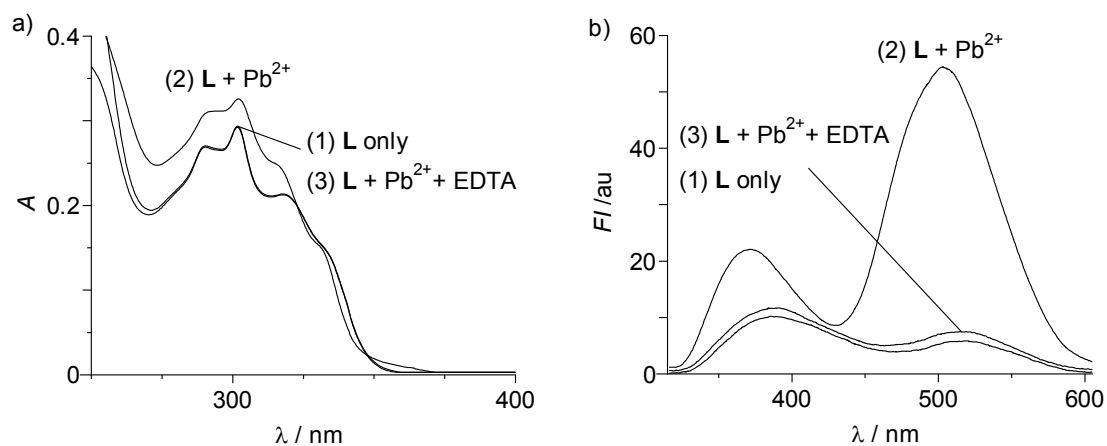

**Fig. S9** (a) Absorption and (b) fluorescence spectra ( $\lambda_{\text{ex}} = 311$  nm) of **L** (20  $\mu\text{M}$ ) in a buffered water/MeCN mixture (1/1 v/v; HEPES 100 mM; pH 7.0) measured (1) without cations, (2) with Pb<sup>2+</sup> (1 equiv), and (3) after addition of EDTA (20 equiv) to the sample (2).

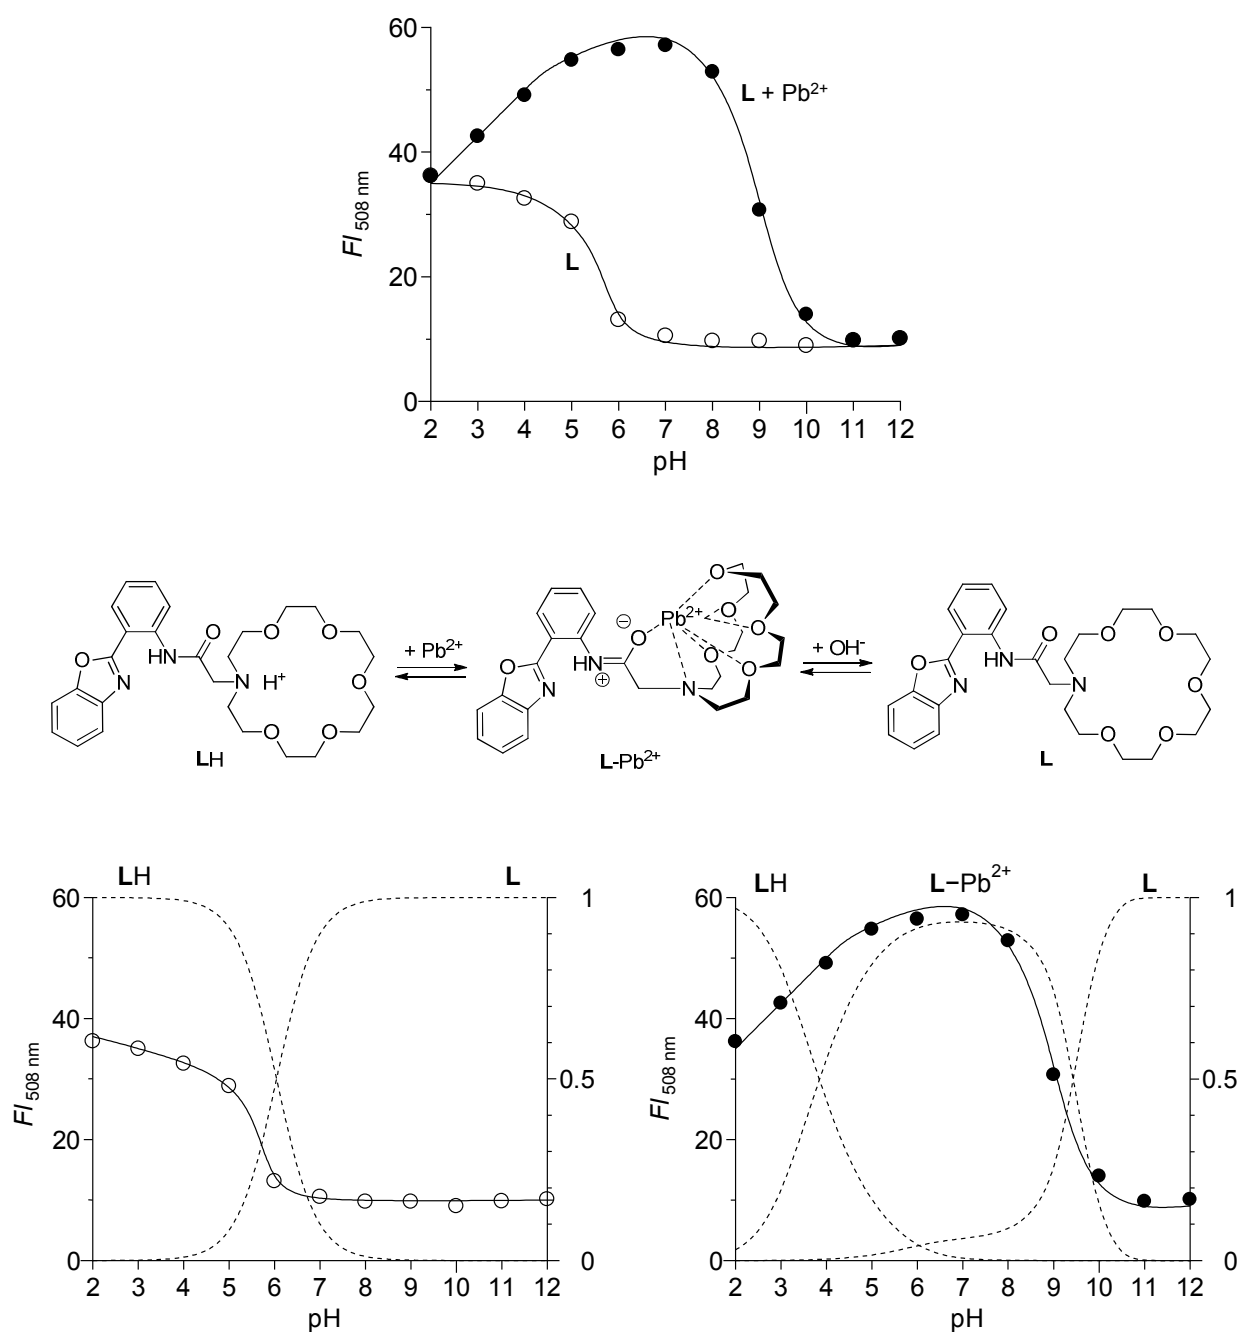

**Fig. S10** (Top) Effect of pH on the fluorescence spectra of **L** measured in a water/MeCN (1/1 v/v) mixture with or without 1 equiv of Pb<sup>2+</sup>. (Bottom) Relationship between the fluorescence intensity and the mole fraction distribution of species determined by potentiometric titration (Table S2).

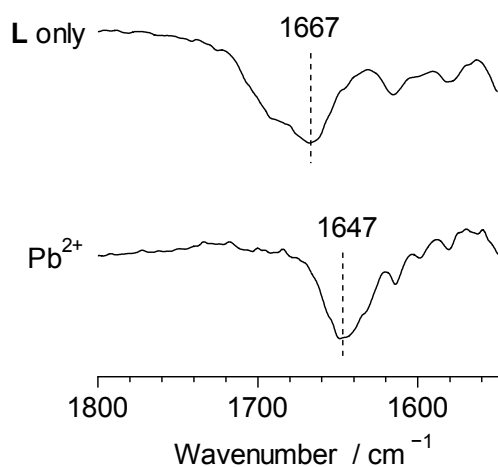

**Fig. S11** IR spectra of **L** (2 mM) measured at 298 K in a D<sub>2</sub>O/MeCN (1/1 v/v, pH 7.0) mixture with and without Pb<sup>2+</sup> (1 equiv).

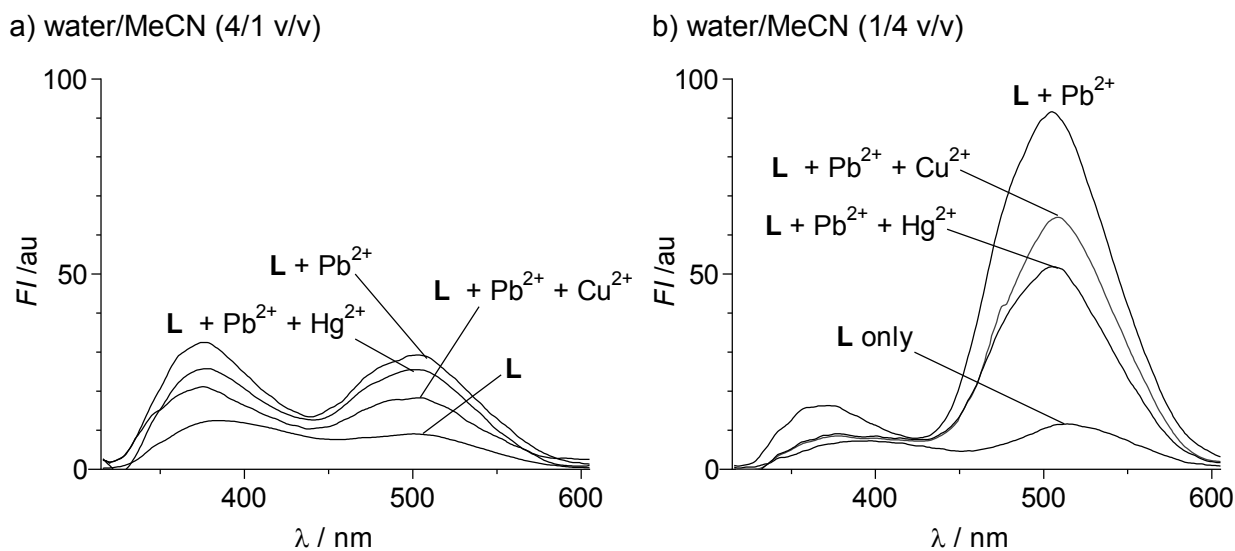

**Fig. S12** Fluorescence spectra ( $\lambda_{\text{ex}} = 311 \text{ nm}$ ) of **L** (20  $\mu\text{M}$ ) in a buffered water/MeCN mixture (HEPES 100 mM; pH 7.0) with solvent composition, measured with 1 equiv of Pb<sup>2+</sup> together with 1 equiv of Cu<sup>2+</sup> or Hg<sup>2+</sup>.

Cartesian coordinates (in Å) of L

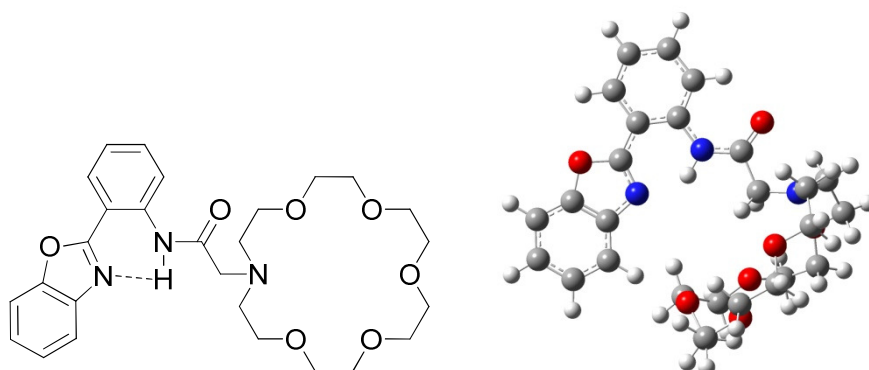

|   |           |           |           |   |           |           |           |   |           |           |           |
|---|-----------|-----------|-----------|---|-----------|-----------|-----------|---|-----------|-----------|-----------|
| C | 5.350461  | -2.638833 | -0.239629 | C | -2.553016 | -2.357635 | -2.936288 | H | -1.708208 | 2.46366   | -2.523713 |
| C | 4.760101  | -3.903607 | -0.318499 | C | -3.354039 | -1.112962 | -3.267125 | H | -3.249275 | 3.250518  | -2.229155 |
| C | 3.362796  | -4.066715 | -0.299934 | O | -0.742721 | -2.6374   | 0.699994  | H | -3.581498 | 1.532926  | -3.903183 |
| C | 2.496086  | -2.977409 | -0.202716 | C | -1.693877 | -3.640406 | 0.395243  | H | -4.421559 | 1.04706   | -2.405854 |
| C | 3.077476  | -1.709386 | -0.123784 | C | -1.859235 | -3.693373 | -1.11298  | H | -3.010385 | -3.222513 | -3.449633 |
| C | 4.471047  | -1.571987 | -0.144403 | C | -3.247746 | 2.921744  | 0.292715  | H | -1.522895 | -2.249144 | -3.312603 |
| N | 2.513762  | -0.439585 | -0.021174 | C | -4.210697 | 2.197354  | 1.230018  | H | -3.510951 | -1.063747 | -4.359641 |
| C | 3.526235  | 0.385884  | 0.008721  | O | -3.461573 | 1.390397  | 2.127584  | H | -4.34472  | -1.187509 | -2.789984 |
| O | 4.758413  | -0.232653 | -0.058687 | C | -4.174775 | 0.296965  | 2.657203  | H | -2.666436 | -3.41508  | 0.853562  |
| C | 3.515527  | 1.838298  | 0.089075  | C | -3.217765 | -0.600733 | 3.417617  | H | -1.356086 | -4.626636 | 0.759943  |
| C | 2.306177  | 2.59476   | 0.048394  | O | -2.252438 | -1.106517 | 2.515464  | H | -0.864973 | -3.747716 | -1.58555  |
| C | 2.395619  | 3.998816  | 0.11291   | C | -1.521245 | -2.200193 | 3.020149  | H | -2.411312 | -4.610148 | -1.388864 |
| C | 3.629701  | 4.629276  | 0.216927  | C | -0.376433 | -2.519271 | 2.062303  | H | -3.825621 | 3.668753  | -0.264497 |
| C | 4.81644   | 3.892074  | 0.259648  | H | 6.426055  | -2.49906  | -0.253603 | H | -2.5146   | 3.479789  | 0.890378  |
| C | 4.749205  | 2.509407  | 0.194756  | H | 5.397411  | -4.779809 | -0.396195 | H | -4.891775 | 1.570661  | 0.634541  |
| N | 1.075105  | 1.934846  | -0.043245 | H | 2.950507  | -5.069999 | -0.363869 | H | -4.819568 | 2.925904  | 1.795117  |
| C | -0.175915 | 2.488362  | -0.257856 | H | 1.416623  | -3.087477 | -0.178829 | H | -4.644518 | -0.284265 | 1.847962  |
| O | -0.378005 | 3.683765  | -0.433033 | H | 1.482187  | 4.572631  | 0.06808   | H | -4.974452 | 0.630942  | 3.34291   |
| C | -1.329724 | 1.460866  | -0.232752 | H | 3.661023  | 5.714641  | 0.265836  | H | -3.797578 | -1.421445 | 3.8738    |
| C | -2.701171 | 2.312438  | -2.077415 | H | 5.778174  | 4.38942   | 0.341334  | H | -2.729209 | -0.04023  | 4.231131  |
| N | -2.596763 | 2.018668  | -0.652821 | H | 5.657064  | 1.917628  | 0.22364   | H | -2.184189 | -3.072273 | 3.15742   |
| O | -2.663279 | 0.025895  | -2.803712 | H | 1.133086  | 0.915191  | -0.009766 | H | -1.080431 | -1.975646 | 4.007471  |
| C | -3.429064 | 1.216958  | -2.854365 | H | -1.432072 | 1.065467  | 0.78427   | H | 0.353635  | -1.705364 | 2.082241  |
| O | -2.556151 | -2.542204 | -1.535746 | H | -1.087305 | 0.599411  | -0.865455 | H | 0.122153  | -3.438469 | 2.418925  |

Cartesian coordinates (in Å) of L–Pb<sup>2+</sup> complex

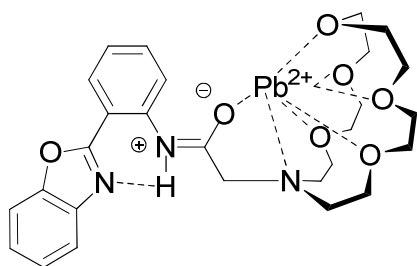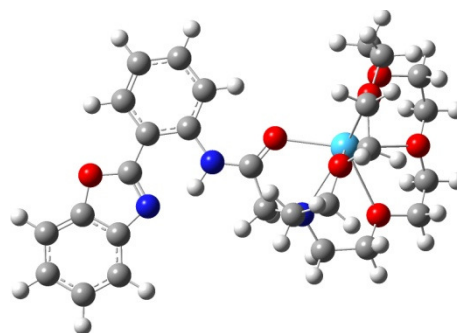

|   |           |           |           |   |           |           |           |    |           |           |           |
|---|-----------|-----------|-----------|---|-----------|-----------|-----------|----|-----------|-----------|-----------|
| C | -8.522253 | -0.47994  | -0.155673 | C | 3.962446  | -2.892702 | -1.484859 | H  | 0.060937  | -4.094487 | 0.471333  |
| C | -8.810046 | -1.84461  | -0.094936 | O | 3.805431  | 2.06417   | -0.961218 | H  | 2.165823  | -4.566007 | -0.684741 |
| C | -7.791185 | -2.817527 | -0.047571 | C | 5.119608  | 1.722346  | -1.424298 | H  | 2.518771  | -3.610151 | 0.761909  |
| C | -6.442882 | -2.468266 | -0.058699 | C | 5.005347  | 0.550252  | -2.375959 | H  | 5.454274  | -2.043457 | -2.761456 |
| C | -6.141002 | -1.104091 | -0.119542 | C | -0.092901 | -1.925882 | 1.840184  | H  | 3.784218  | -1.681373 | -3.266006 |
| C | -7.173821 | -0.158865 | -0.165913 | C | 1.161909  | -1.884422 | 2.701267  | H  | 3.94098   | -3.840255 | -2.037335 |
| N | -4.928956 | -0.414103 | -0.148471 | O | 1.892682  | -0.693812 | 2.36422   | H  | 4.630769  | -3.003434 | -0.620613 |
| C | -5.253786 | 0.854096  | -0.210303 | C | 3.015397  | -0.386126 | 3.215617  | H  | 5.771305  | 1.452413  | -0.583616 |
| O | -6.593096 | 1.089931  | -0.223033 | C | 3.314882  | 1.097369  | 3.091732  | H  | 5.559752  | 2.579433  | -1.950533 |
| C | -4.352779 | 2.001922  | -0.269577 | O | 3.416706  | 1.426294  | 1.70165   | H  | 4.341661  | 0.794644  | -3.21684  |
| C | -2.938477 | 1.854346  | -0.271823 | C | 4.138623  | 2.636726  | 1.413135  | H  | 6.000583  | 0.313121  | -2.774845 |
| C | -2.117601 | 2.984869  | -0.33595  | C | 3.753713  | 3.108722  | 0.014022  | H  | -0.702415 | -2.789242 | 2.146386  |
| C | -2.686377 | 4.256486  | -0.400605 | H | -9.297856 | 0.276515  | -0.193468 | H  | -0.670825 | -1.024023 | 2.063039  |
| C | -4.072716 | 4.415125  | -0.399516 | H | -9.847085 | -2.16456  | -0.084687 | H  | 1.79795   | -2.76869  | 2.575813  |
| C | -4.895051 | 3.295118  | -0.333982 | H | -8.069083 | -3.865825 | -0.001981 | H  | 0.859693  | -1.834221 | 3.754503  |
| N | -2.427818 | 0.527651  | -0.217928 | H | -5.660798 | -3.219629 | -0.023817 | H  | 3.879014  | -0.993415 | 2.916347  |
| C | -1.178408 | 0.079714  | -0.230047 | H | -1.044174 | 2.864557  | -0.338084 | H  | 2.763252  | -0.620069 | 4.256107  |
| O | -0.146814 | 0.812147  | -0.226709 | H | -2.038761 | 5.126212  | -0.453481 | H  | 4.260815  | 1.307737  | 3.606372  |
| C | -1.042229 | -1.443363 | -0.336516 | H | -4.512786 | 5.405648  | -0.45055  | H  | 2.521011  | 1.698714  | 3.552242  |
| C | 0.52922   | -3.307929 | -0.136906 | H | -5.972949 | 3.408485  | -0.334304 | H  | 5.213505  | 2.4386    | 1.508697  |
| N | 0.153602  | -1.955059 | 0.371741  | H | -3.192528 | -0.181254 | -0.192454 | H  | 3.868332  | 3.419389  | 2.133217  |
| O | 2.631574  | -2.57107  | -1.037088 | H | -0.934138 | -1.670208 | -1.403348 | H  | 2.716354  | 3.456491  | 0.011014  |
| C | 2.028443  | -3.580911 | -0.220124 | H | -1.961561 | -1.939204 | 0.005674  | H  | 4.395573  | 3.948646  | -0.281679 |
| O | 4.489524  | -0.57193  | -1.647507 | H | 0.130774  | -3.409385 | -1.149422 | Pb | 2.120923  | -0.065601 | -0.141364 |
| C | 4.449939  | -1.787074 | -2.397731 |   |           |           |           |    |           |           |           |
